# Supplementary material for: Mn2+ induced structure evolution and dual-frequency microwave absorption of MnxFe3−xO4 hollow/porous spherical chains made by a one-pot solvothermal approach
Source: Royal Society of Chemistry journal article supplement (doi:10.1039/c6tc01900e), 2016-01-01
Supplement: c6tc01900e1.pdf [file c6tc01900e1.pdf]

## Electronic Supplementary Information (ESI)

# **Mn<sup>2+</sup> induced structure evolution and dual-frequency microwave absorption of Mn<sub>x</sub>Fe<sub>3-x</sub>O<sub>4</sub> hollow/porous spherical chains made by one-pot solvothermal approach**

Yana Li,<sup>a</sup> Tong Wu,<sup>b</sup> Kedan Jiang,<sup>a</sup> Guoxiu Tong,<sup>\*,a</sup> Keying Jin,<sup>a</sup> Naxin Qian,<sup>a</sup> Leihong Zhao,<sup>\*,a</sup> and Tianxi Lv<sup>a</sup>

<sup>a</sup> College of Chemistry and Life Sciences, Zhejiang Normal University, Jinhua 321004, People's Republic of China

<sup>b</sup> College of Chemistry and Molecular Sciences, Wuhan University, Wuhan 430072 People's Republic of China

<sup>\*</sup>Corresponding authors. Tel.: +86-579-82282269; Fax: +86-579-82282269. E-mail address: [tongqx@zjnu.cn](mailto:tongqx@zjnu.cn) (G.X. Tong).

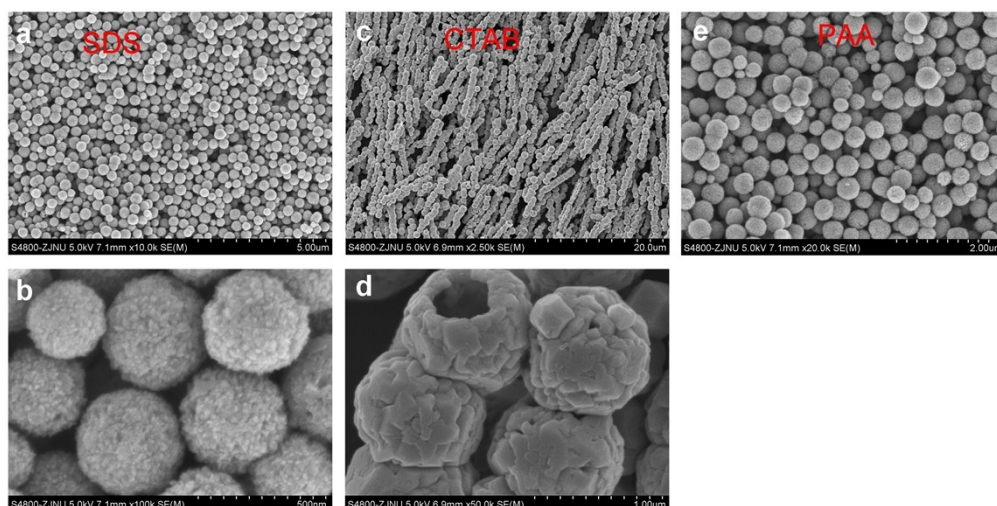

**Fig. S1** SEM images of the products obtained using (a and b) SDS, (c and d) CTAB, and (e) PAA as surfactants at 220 °C for 12h obtained under the external magnetic field.

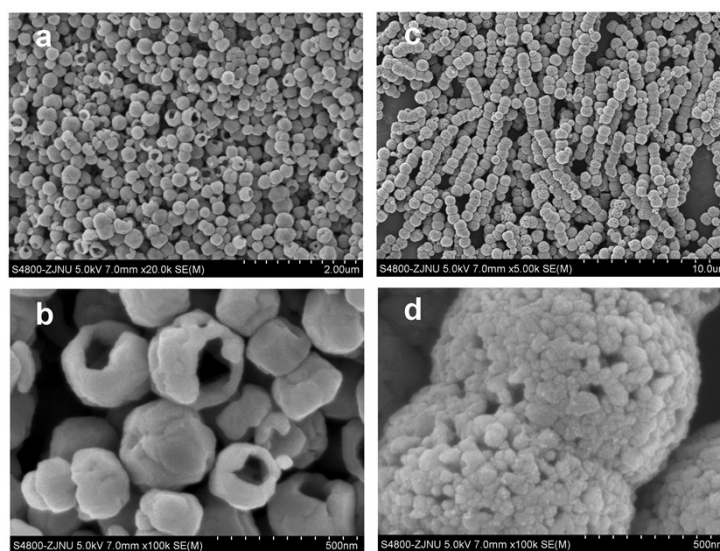

**Fig. S2** SEM images of the products obtained with various EDA volumes (a and b) 0.34 ml and (c and d) 1.34 ml at 220 °C for 12 h obtained under the external magnetic field.

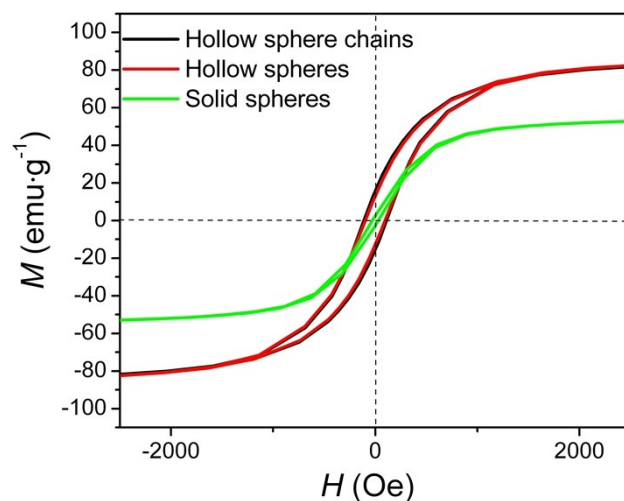

**Fig. S3** Magnetic hysteresis loops of  $\text{Fe}_3\text{O}_4$  samples with various morphologies and structures.

**Table S1** A comparison of static magnetic properties for  $\text{MnFe}_2\text{O}_4$  nanostructures.

| sample                    | method            | Shape/structure | $H_c(\text{Oe})$ | $M_s$ | Refer. |
|---------------------------|-------------------|-----------------|------------------|-------|--------|
| $\text{MnFe}_2\text{O}_4$ | hydrothermal      | nanorods        | 361              | 68.02 | [1]    |
| $\text{MnFe}_2\text{O}_4$ | microwave         | spongy          | 72.63            | 79.98 | [2]    |
| $\text{MnFe}_2\text{O}_4$ | hydrothermal      | nanoparticles   | 43.9             | 52.40 | [3]    |
| $\text{MnFe}_2\text{O}_4$ | sol-gel/calcining | nanofibers      | $1 \cdot 10^4$   | 61.00 | [4]    |
| $\text{MnFe}_2\text{O}_4$ | one-pot microwave | nanoplatelets   | 51.45            | 66.89 | [5]    |
| $\text{MnFe}_2\text{O}_4$ | solvothermal      | hollow spheres  | 39.5             | 76.50 | [6]    |
| $\text{MnFe}_2\text{O}_4$ | solvothermal      | octahedrons     | 520              | 67.26 | [7]    |
| $\text{MnFe}_2\text{O}_4$ | arc-discharge     | nanocapsules    | 600              | 97.00 | [8]    |

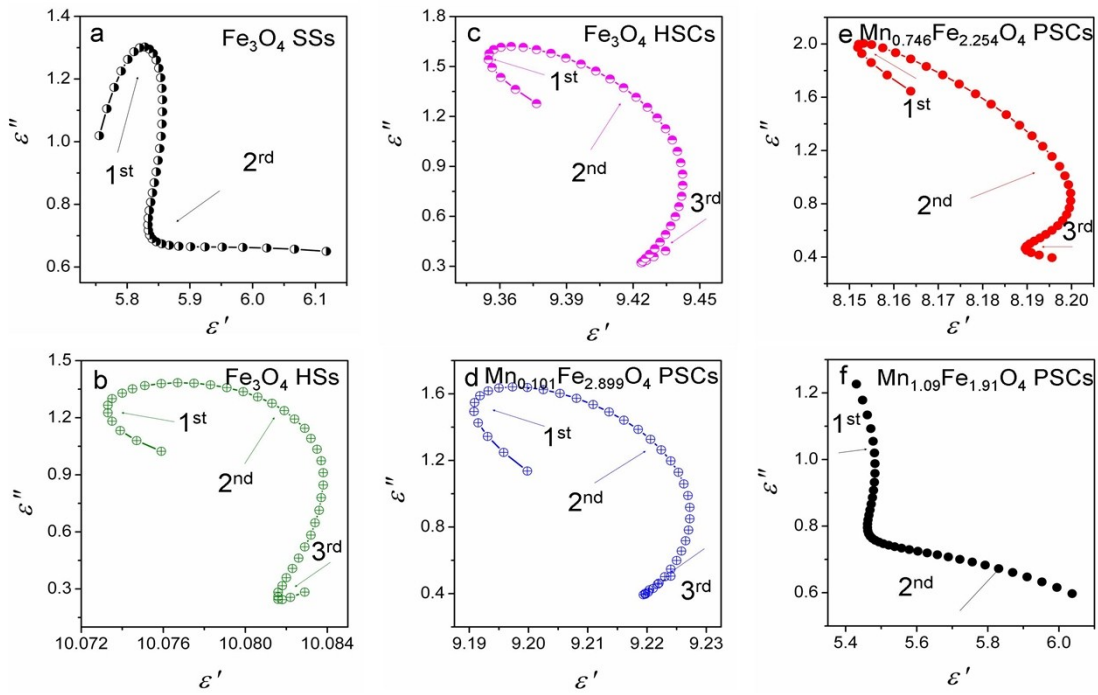

**Fig. S4** Cole-Cole semicircles ( $\epsilon'$  versus  $\epsilon''$ ) of the various samples.

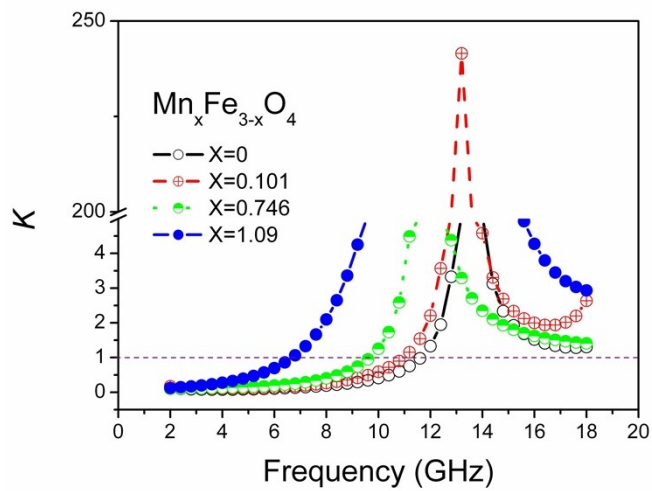

**Fig. S5** Matching constants ( $K$ ) of wax composites containing 60 w%  $\text{Mn}_x\text{Fe}_{3-x}\text{O}_4$  PSCs ( $0 \leq X \leq 1.09$ ) samples.

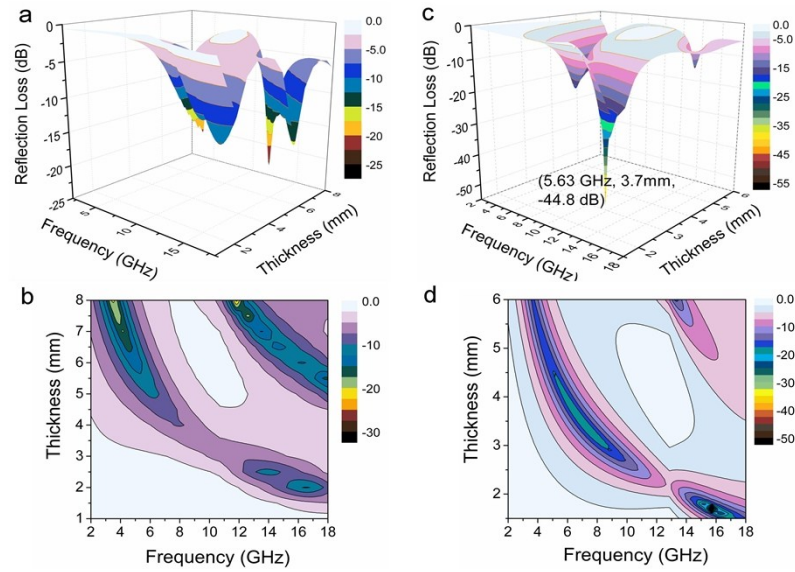

**Fig. S6** Frequency dependences of reflection loss calculated for paraffin composites containing 60wt.% (a-b)  $\text{Fe}_3\text{O}_4$  SSs and (c-d)  $\text{Fe}_3\text{O}_4$  HSs. (a and c) Three-dimensional (3D) reflection loss curves and (b-d) the corresponding 2D contour curves.

## References

- [1] J. Wang, Q. W. Chen, B. Y. Hou and Z. M. Peng, *Eur. J. Inorg. Chem.*, 2004, 1165–1168.  
DOI: 10.1002/ejic.200300555
- [2] M. Kooti and A. Naghdi Sedeh, *Nanotechnology*, 2012, **19**, 930–933.
- [3] S. Phumying, S. Labuayai, E. Swatsitang, V. Amornkitbamrung and S. Maensiri, *Mate. Res. Bull.*, 2013, **48**, 2060–2065
- [4] Y. W. Ju, J. H. Park, H. R. Jung, S. J. Cho and W. J. Lee, *Compos. Sci. technol.*, 2008, **68**, 1704–1709.
- [5] J. JudithVijaya, G. Sekaran and M. Bououdina, *Ceram. Int.*, 2015, **41**, 15–26.
- [6] P. Z. Guo, G. L. Zhang, J. Q. Yu, H. L. Li and X. S. Zhao, *Colloids Surf. A Physicochem. Eng. Asp.*, 2012, **395**, 168–174.
- [7] D. G. Zhang, X. J. Zhang, X. M. Ni, J. M. Song and H. G. Zheng, *Chem. Phys. Lett.*, 2006, **426**, 120–123.
- [8] Z. Han, D. Li, X. G. Liu, D. Y. Geng, J. Li and Z. D. Zhang, *J. Phys. D: Appl. Phys.*, 2009, **42**, 055008.
